# Supplementary material for: A durable VO2 transition layer and defect inactivation in BiVO4via spontaneous valence-charge control
Source: Royal Society of Chemistry journal article supplement (doi:10.1039/d2ta05260a), 2022-01-01
Supplement: d2ta05260a1.pdf [file d2ta05260a1.pdf]

## Supplementary information

### Durable VO<sub>2</sub> transition layer and defect inactivation in BiVO<sub>4</sub> via spontaneous valence-charge control

*Dong Su Kim,<sup>a,1</sup> Kun Woong Lee,<sup>a,1</sup> Ji Hoon Choi,<sup>a</sup> Hak Hyeon Lee,<sup>a</sup> Hee Won Suh<sup>a</sup>, Ho Seong Lee<sup>c</sup> and Hyung Koun Cho<sup>a,b,\*</sup>*

<sup>a</sup> School of Advanced Materials Science and Engineering, Sungkyunkwan University, 2066, Seobu-ro, Jangan-gu, Suwon-si, Gyeonggi-do, 16419, Republic of Korea.

<sup>b</sup> Research Center for Advanced Materials Technology, Sungkyunkwan University (SKKU), 2066 Seobu-ro, Jangan-gu, Suwon, Gyeonggi-do, Republic of Korea.

<sup>c</sup> School of Materials Science and Engineering, Kyungpook National University, 80, Daehak-ro, Buk-gu, Daegu 41566, Republic of Korea.

\* Corresponding author.

<sup>1</sup> The authors contributed equally to this work.

Tel.: +82 31 290 7364; Fax: +82 31 290 7410; E-mail: chohk@skku.edu

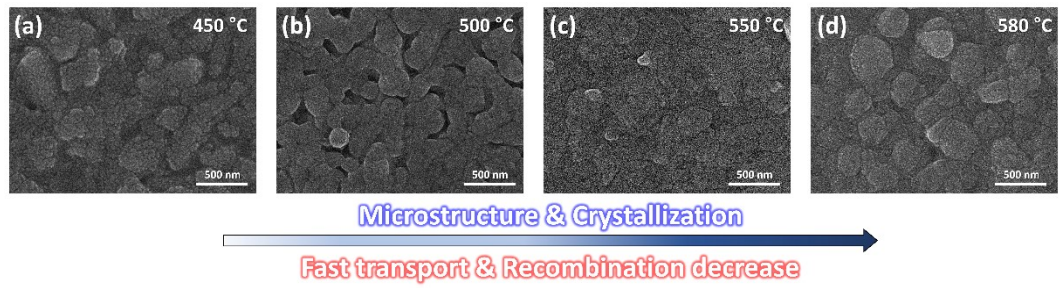

**Fig. S1** Comparison of SEM images of the BiVO<sub>4</sub> thin film at different annealing temperatures of (a) 450, (b) 500, (c) 550, and (d) 580 °C in the sol-gel process. As the temperature increases, the crystallinity and grain size of the surface increase, and the grain boundary that act as surface defects tends to decrease. Consequently, the mobility of charge carriers increases, and the recombination of charge decreases.

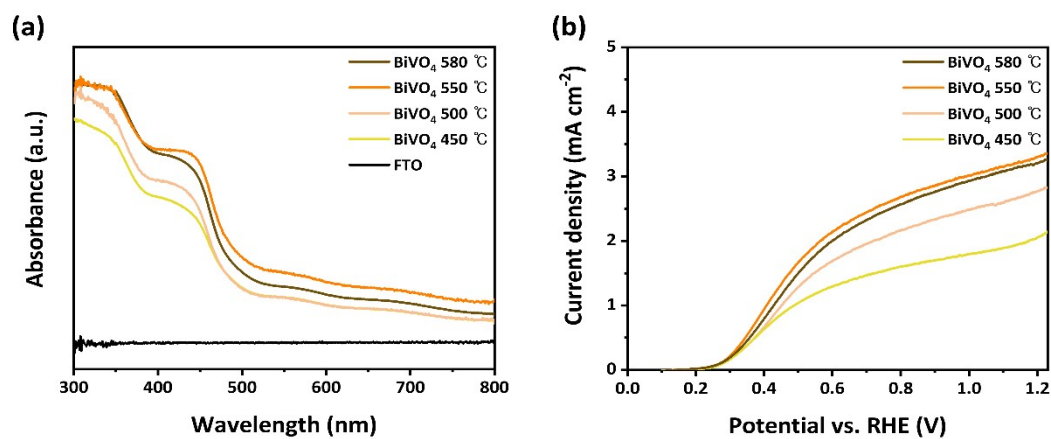

**Fig. S2** Evaluations of the BiVO<sub>4</sub> thin film at different annealing temperatures (450, 500, 550, and 580 °C). (a) Ultraviolet–visible absorption spectra of BiVO<sub>4</sub> and FTO substrates with an integrating sphere from 300 to 800 nm. (b) Linear-sweep voltammetry of BiVO<sub>4</sub> photoanodes in 1.0 M PB electrolyte with 0.1M Na<sub>2</sub>SO<sub>3</sub> as hole scavenger under AM 1.5 G illumination (100 mW cm<sup>-2</sup>) with a scan rate of 10 mV s<sup>-1</sup>.

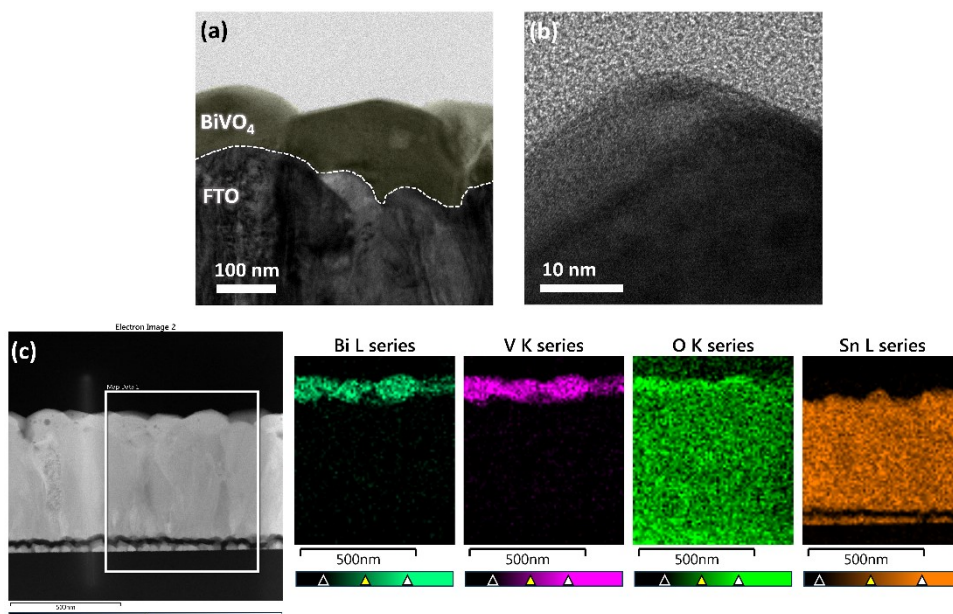

**Fig. S3** TEM images of pristine  $\text{BiVO}_4$  formed through the optimal sol-gel process with an accelerating voltage of 200 KeV. (a) Cross-sectional image of  $\text{BiVO}_4$  in the form of thin film over 100 nm on the FTO Substrate. (b) High-resolution (HR)TEM image of the  $\text{BiVO}_4$ . (c) STEM-EDS elemental mappings of Bi, V, O, and Sn in the  $\text{BiVO}_4$  thin film.

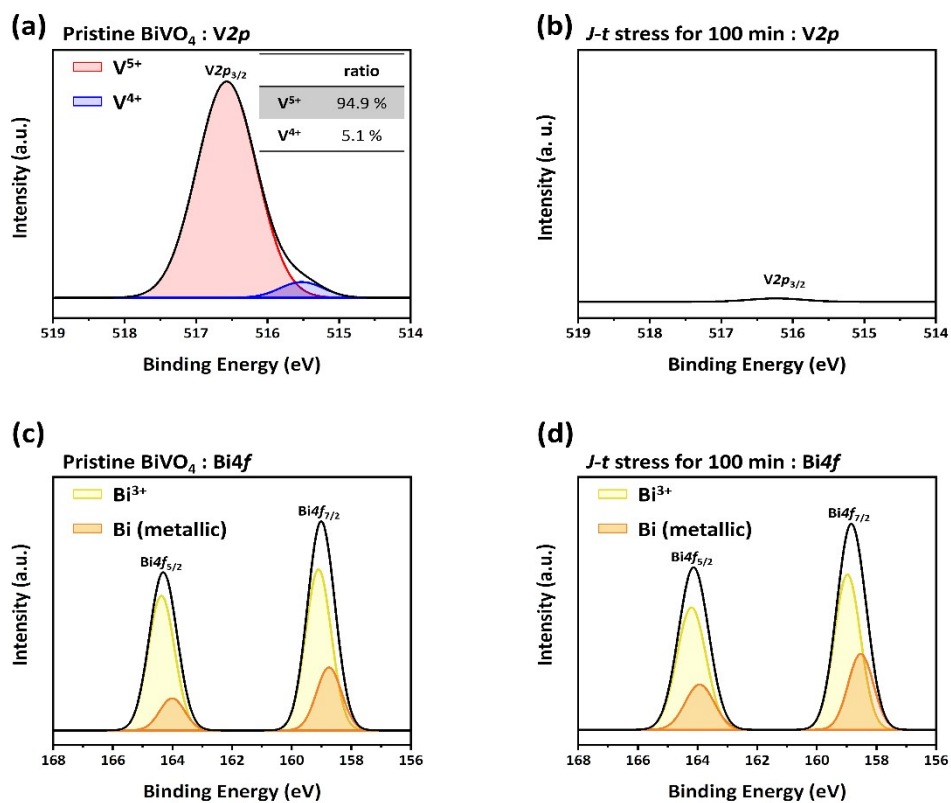

**Fig. S4** Fitted XPS spectra of  $\text{V}2p$  and  $\text{Bi}4f$  of pristine  $\text{BiVO}_4$  and  $\text{BiVO}_4$  after  $J$ - $t$  stress for 100 min in the PB electrolyte. (a) is  $\text{V}2p$  of pristine  $\text{BiVO}_4$ , (b) is  $\text{V}2p$  of  $\text{BiVO}_4$  after  $J$ - $t$  stress, (c) is  $\text{Bi}4f$  of pristine  $\text{BiVO}_4$ , and (d) is  $\text{Bi}4f$  of  $\text{BiVO}_4$  after  $J$ - $t$  stress. In (a), the red area means  $\text{V}^{5+}$  and the blue area means  $\text{V}^{4+}$  fitting area. In (b), which was measured in  $\text{PEC}_{(\text{aq})}$ , photo-corrosion occurred because of the long measurement time, and therefore,  $\text{V}2p$  could not be confirmed in XPS spectra. In (c), the yellow area means  $\text{Bi}^{3+}$  and the orange area means  $\text{Bi}^0$  (metallic) fitting area in XPS spectra.

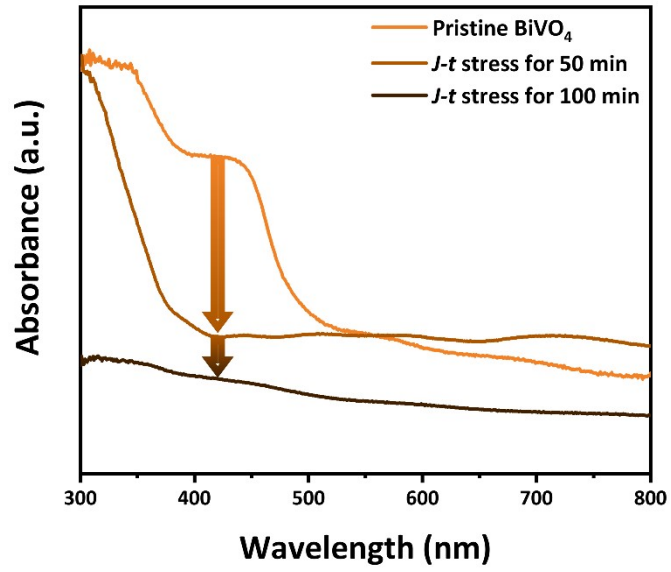

**Fig. S5** Ultraviolet-visible absorption spectra of pristine BiVO<sub>4</sub> and BiVO<sub>4</sub> after *J-t* stress at 1.23 V<sub>RHE</sub> for 50 and 100 min. The spectra after stress are affected by the bulk as well as the surface properties through photo-corrosion by external applied bias and illumination, and thus, show differences in optical properties.

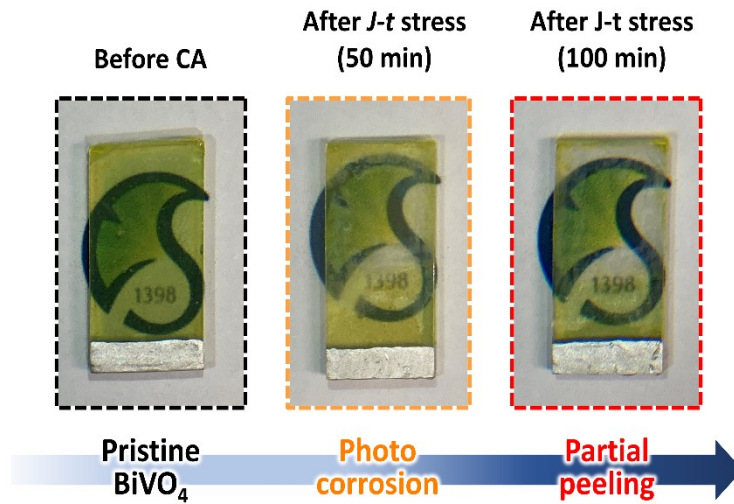

**Fig. S6** Optical images of BiVO<sub>4</sub> before (black) and after *J-t* stress (CA: chronoamperometry) at 1.23 V<sub>RHE</sub> for 50 and 100 min. As *J-t* was measured, photo-corrosion occurred on the film surface exposed to light (0.8 × 0.8 cm<sup>2</sup>) (orange) and partial peeling occurred intensively in the region where photo-corrosion has progressed (red), according to the photo-corrosion process in Figure 1e. BiVO<sub>4</sub> partially peeled by photo-corrosion loses its photo-absorber function.

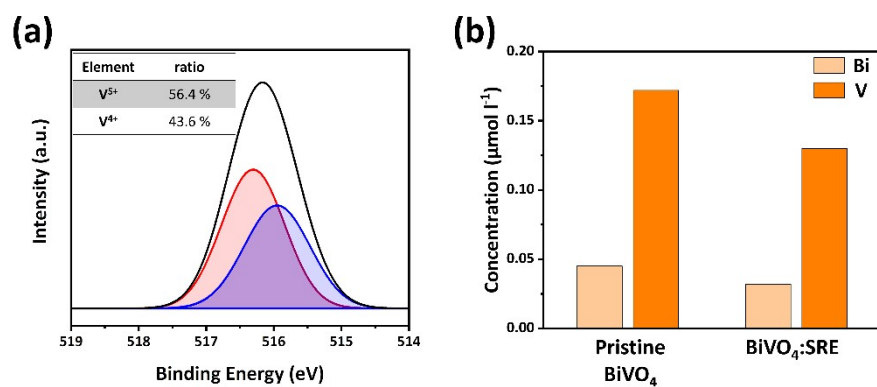

**Fig. S7** (a) Fitted XPS spectra of V2p BiVO<sub>4</sub> after *J-t* stress in SRE<sub>(aq)</sub>. The ratio of V<sup>5+</sup> and V<sup>4+</sup> is shown in the inset table. (b) ICP-OES data showing the ion concentration of Bi and V in pristine BiVO<sub>4</sub> and BiVO<sub>4</sub> after *J-t* stress in SRE<sub>(aq)</sub>.



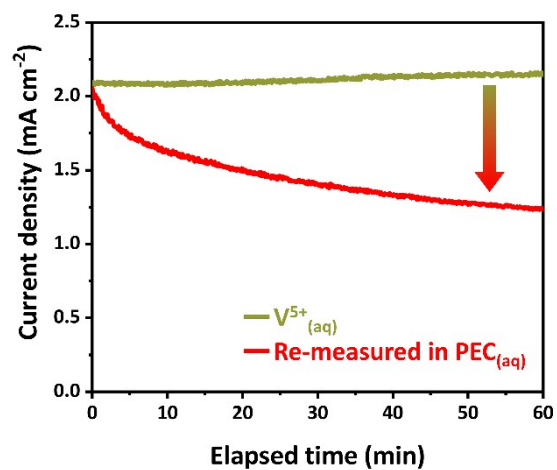

**Fig. S8** CA of BiVO<sub>4</sub> measured for 5000 s in PEC electrolyte saturated with V<sup>5+</sup> (green) and re-measured in normal PEC electrolyte (red) under AM 1.5 G illumination (100 mW cm<sup>-2</sup>) with a scan rate of 10 mV s<sup>-1</sup>.

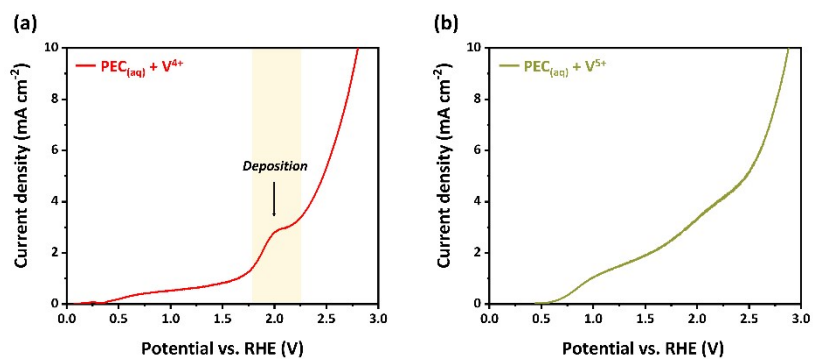

**Fig. S9** (a) LSV of BiVO<sub>4</sub> in electrolyte saturated with V<sup>4+</sup> (red line) and (b) LSV plot of BiVO<sub>4</sub> in electrolyte saturated with V<sup>5+</sup> (green line) under AM 1.5 G illumination (100 mW cm<sup>-2</sup>) with a scan rate of 10 mV s<sup>-1</sup>. The electrolyte saturated with V<sup>4+</sup> is prepared by adding 0.1M VOSO<sub>4</sub> directly to the PB electrolyte.

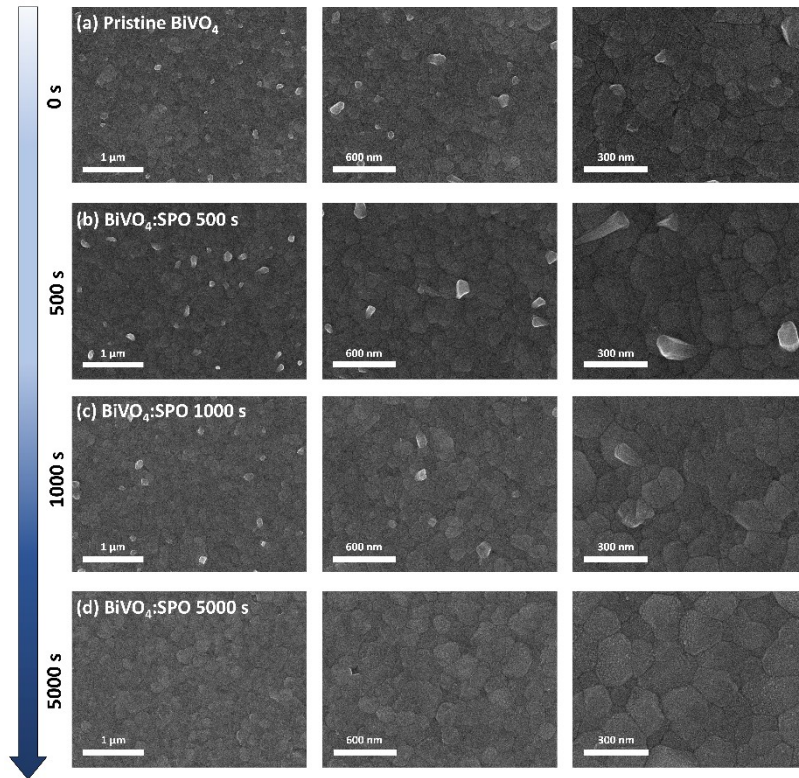

**Fig. S10** SEM images of the surface-morphology change of BiVO<sub>4</sub> depending on SPO process time: (a) before SPO, and after (b) 500, (c) 1000, and (d) 5000 s.

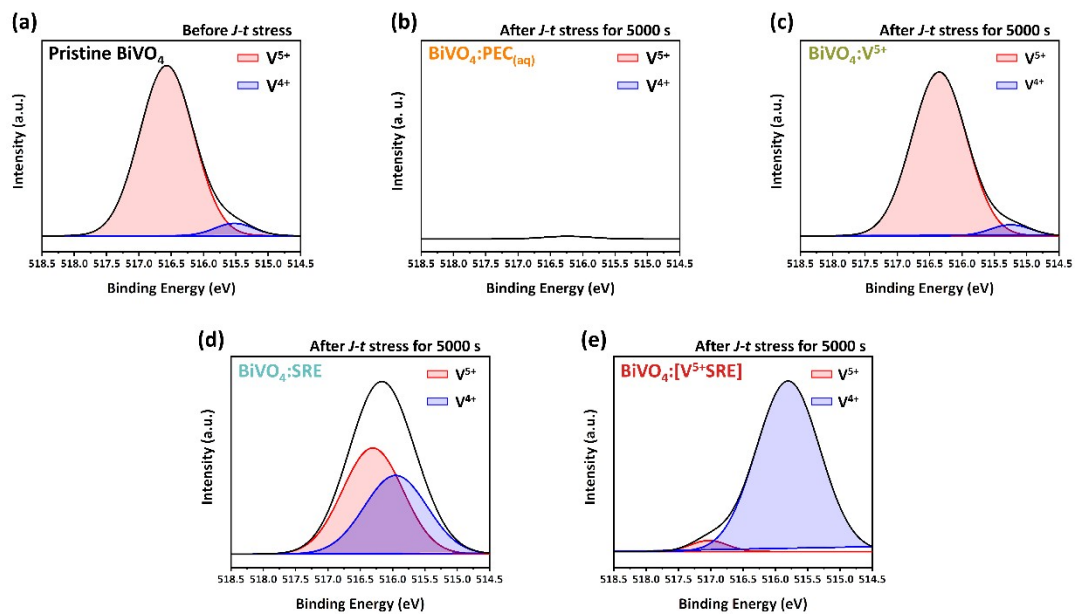

**Fig. S11** Fitted XPS spectra of  $V 2p_{3/2}$  of pristine  $BiVO_4$  and  $BiVO_4$  after  $J-t$  stress for 5000 s in different electrolytes: (a) pristine; (b) in  $PEC_{(aq)}$ ; (c) in  $V^{5+}_{(aq)}$ ; (d) in  $SRE_{(aq)}$ ; (e) in  $V^{5+}SRE_{(aq)}$ . The red and blue areas are  $V^{5+}$  and  $V^{4+}$  fitting areas, respectively.

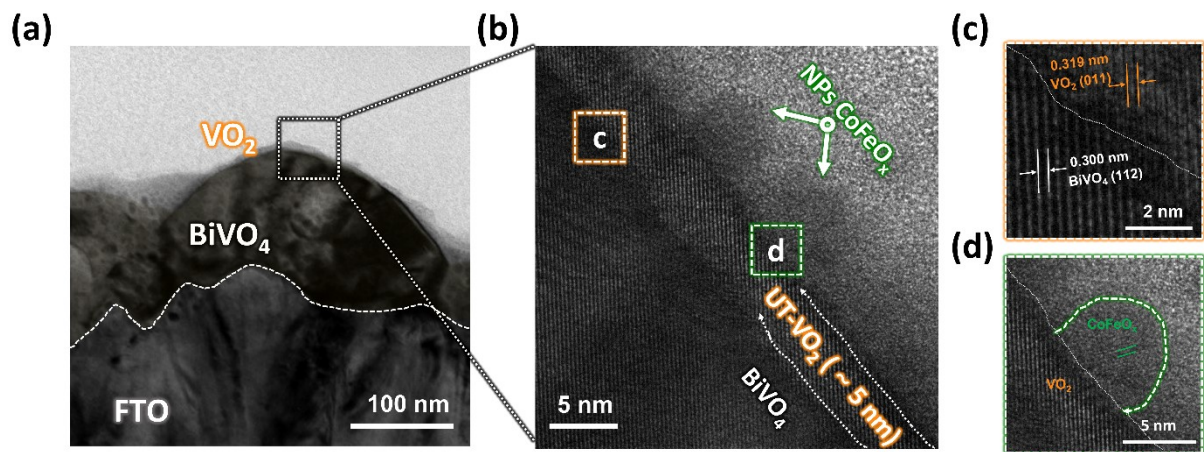

**Fig. S12** HR-TEM images of the  $\text{BiVO}_4/\text{VO}_2/\text{CoFeO}_x$  photoanode obtained at an accelerating voltage of 200 keV. (a) Cross-sectional image of the photoanode on the FTO Substrate. (b), (c), and (d) Enlarged HRTEM images of the photoanode.

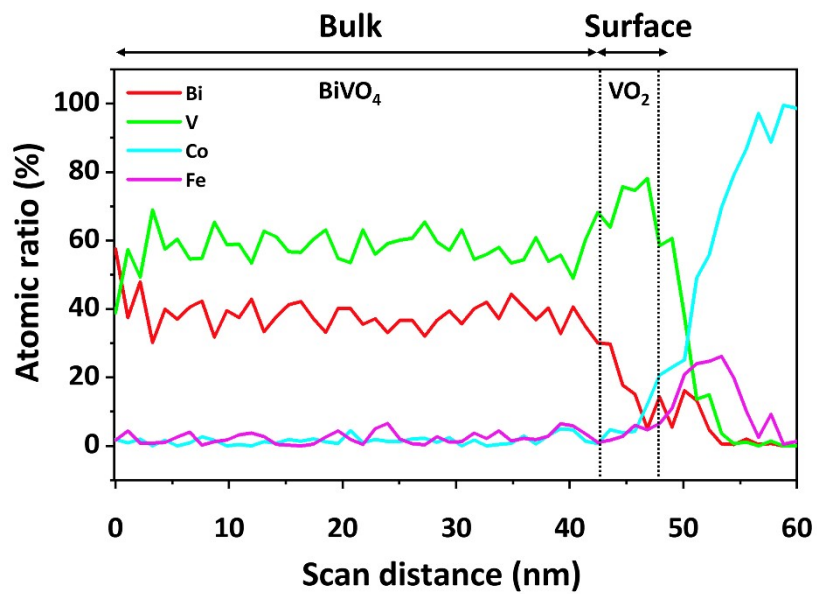

Fig. S13 EDX line profiling of BiVO<sub>4</sub>/VO<sub>2</sub>/CoFeO<sub>x</sub> photoanode.

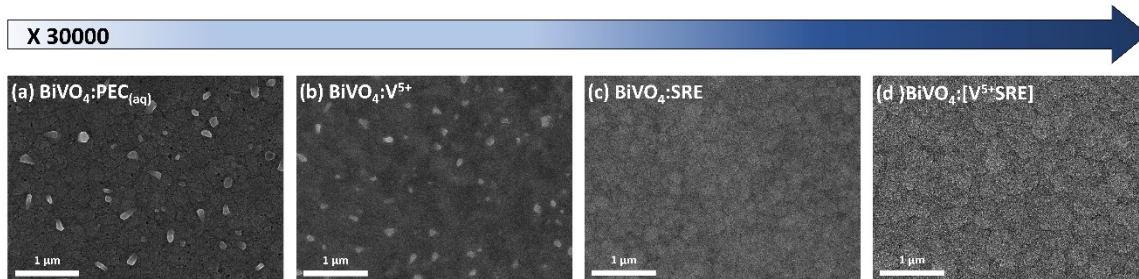

**Fig. S14** SEM images of the surface morphology change of BiVO<sub>4</sub> after *J-t* stress in different electrolytes for 5000 s. (a) in PEC<sub>(aq)</sub>, (b) in V<sup>5+</sup><sub>(aq)</sub>, (c) in SRE<sub>(aq)</sub>, and (d) is in V<sup>5+</sup>SRE<sub>(aq)</sub>.

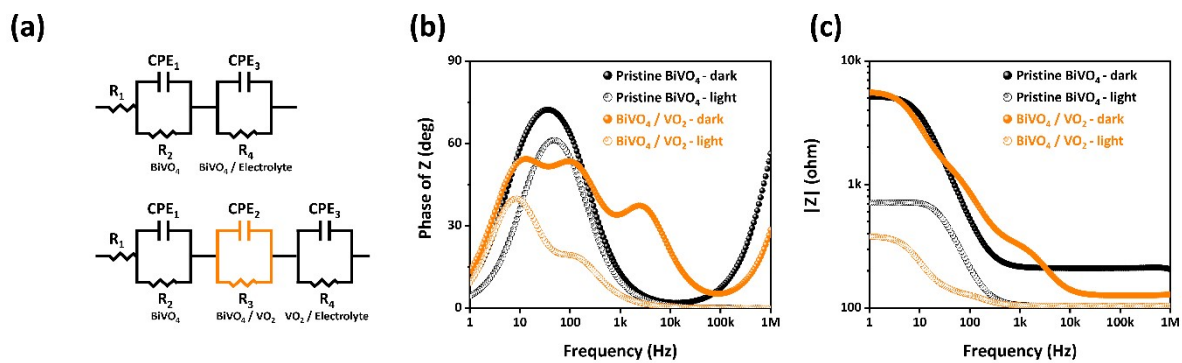

**Fig. S15** (a) Equivalent circuit for BiVO<sub>4</sub> (top) and BiVO<sub>4</sub>/VO<sub>2</sub> (bottom) photoanodes. (b) Bode phase plot of the photoanodes. (c) Bode plots of phase and magnitude of Z against frequency in the dark and illuminated states.



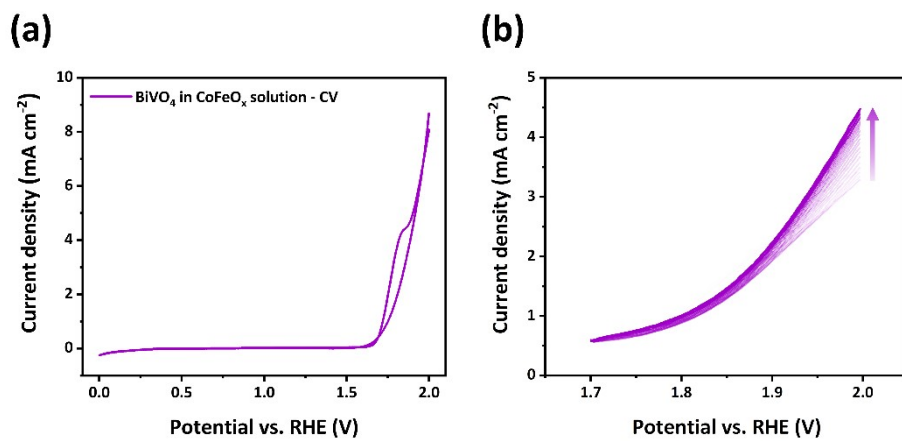

**Fig. S16** (a) Cyclic voltammetry of  $\text{BiVO}_4$  from 0 to  $2.0 V_{\text{RHE}}$ . (b) Consecutive-linear-sweep voltammetry (30 cycles) plot of  $\text{BiVO}_4$  at from 1.7 to  $2.0 V_{\text{RHE}}$  in the  $\text{CoFeO}_x$  deposition solution under AM 1.5 G illumination ( $100 \text{ mW cm}^{-2}$ ) with a scan rate of  $10 \text{ mV s}^{-1}$ .

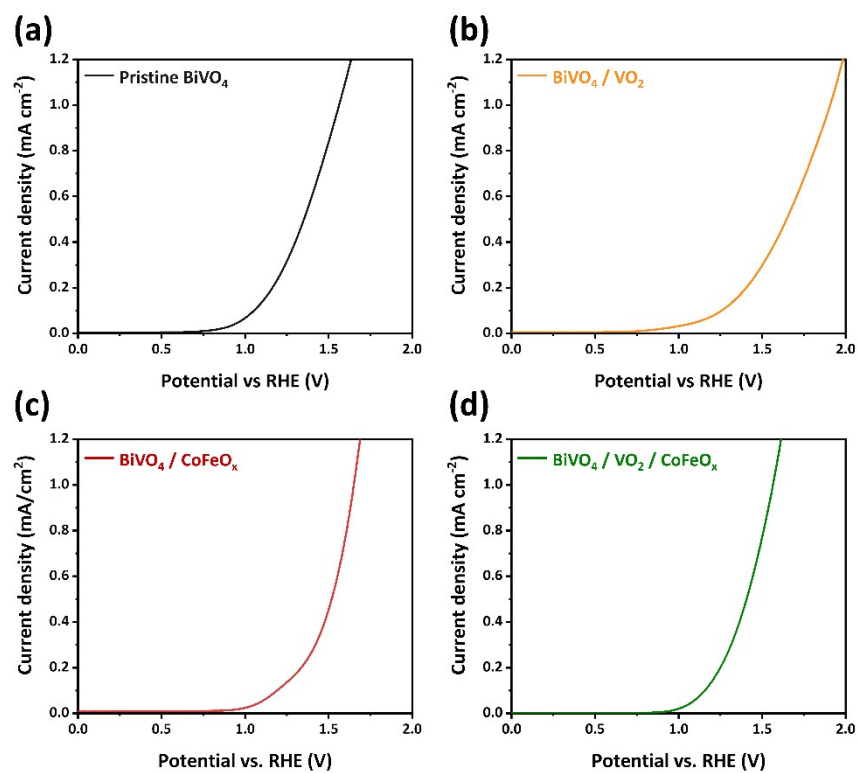

**Fig. S17** LSV of photoanodes from 0 to 2.0 V<sub>RHE</sub> in the PB electrolyte in a dark state with a scan rate of 10 mV s<sup>-1</sup>: (a) pristine BiVO<sub>4</sub>; (b) BiVO<sub>4</sub>/VO<sub>2</sub>; (c) BiVO<sub>4</sub>/CoFeO<sub>x</sub>; (d) BiVO<sub>4</sub>/VO<sub>2</sub>/CoFeO<sub>x</sub> photoanodes.

**Table S1** Comparison of V<sup>4+</sup> and V<sup>5+</sup> fitting-area ratios and binding energies at V2p<sub>3/2</sub> peak of X-ray photoelectron spectra of pristine BiVO<sub>4</sub> and BiVO<sub>4</sub> after *J-t* stress in different electrolytes.

|                                             | Pristine BiVO <sub>4</sub> | BiVO <sub>4</sub> :<br>PEC <sub>(aq)</sub> | BiVO <sub>4</sub> :V <sup>5+</sup> | BiVO <sub>4</sub> :SRE | BiVO <sub>4</sub> :<br>[V <sup>5+</sup> SRE] |
|---------------------------------------------|----------------------------|--------------------------------------------|------------------------------------|------------------------|----------------------------------------------|
| V <sup>4+</sup> /V <sup>5+</sup> area ratio | 0.14                       | Corrosion                                  | 0.12                               | 0.77                   | 7.63                                         |
| (Center peak<br>position, eV)               | (516.60)                   | (516.35)                                   | (516.36)                           | (516.15)               | (515.81)                                     |

**Table S2** Comparison of X-ray photoelectron peak intensities of  $\text{Bi}4f$ ,  $\text{V}2p$ , and  $\text{O}1s$  in pristine  $\text{BiVO}_4$  and  $\text{BiVO}_4$  after  $J$ - $t$  stress in different electrolytes. In the  $\text{PEC}_{(\text{aq})}$  condition, the calculated  $\text{V}2p$  value is remarkably low, because of  $\text{V}^{5+}$  dissolution by photo-corrosion.

|                                 | Pristine $\text{BiVO}_4$ | $\text{BiVO}_4:\text{PEC}_{(\text{aq})}$ | $\text{BiVO}_4:\text{V}^{5+}$ | $\text{BiVO}_4:\text{SRE}$ | $\text{BiVO}_4:$<br>$[\text{V}^{5+}\text{SRE}]$ |
|---------------------------------|--------------------------|------------------------------------------|-------------------------------|----------------------------|-------------------------------------------------|
| <b><math>\text{Bi}4f</math></b> | 15.51                    | 20.41                                    | 14.42                         | 16.48                      | 12.92                                           |
| <b><math>\text{V}2p</math></b>  | 11.57                    | 0.59                                     | 8.25                          | 10.73                      | 13.24                                           |
| <b><math>\text{O}1s</math></b>  | 72.92                    | 79.00                                    | 77.33                         | 72.79                      | 73.84                                           |

**Table S3** Comparison of EDX composition results in the bulk regions of pristine BiVO<sub>4</sub> and BiVO<sub>4</sub> after *J-t* stress in different electrolytes. The decrease of Bi4*f* and increase of V2*p* through surface photoelectrochemical oxidation resulted in a 1:1 ratio of Bi and V, indicating modification of unstable BiVO<sub>4</sub>.

|                    | Pristine BiVO <sub>4</sub> | BiVO <sub>4</sub> :PEC <sub>(aq)</sub> | BiVO <sub>4</sub> :V <sup>5+</sup> | BiVO <sub>4</sub> :SRE | BiVO <sub>4</sub> :<br>[V <sup>5+</sup> :SRE] |
|--------------------|----------------------------|----------------------------------------|------------------------------------|------------------------|-----------------------------------------------|
| <b>Bi4<i>f</i></b> | 5.41                       | 5.57                                   | 5.48                               | 5.42                   | 5.50                                          |
| <b>V2<i>p</i></b>  | 4.02                       | 3.46                                   | 4.14                               | 4.62                   | 5.89                                          |
| <b>O1<i>s</i></b>  | 70.37                      | 70.70                                  | 70.05                              | 69.73                  | 68.51                                         |
| <b>Sn</b>          | 20.20                      | 20.27                                  | 20.33                              | 20.23                  | 20.10                                         |

**Table S4** Performance comparison. Comparison of photoelectrochemical performances of photoanodes composed of protection layers and oxygen-evolution catalysts based on pristine BiVO<sub>4</sub>. J<sub>ph</sub><sup>(1)</sup> is the photocurrent density (mA cm<sup>-2</sup>) of a single layer of pristine BiVO<sub>4</sub> at 1.23 V<sub>RHE</sub>; J<sub>ph</sub><sup>(2)</sup> is the photocurrent density (mA cm<sup>-2</sup>) of BiVO<sub>4</sub> having oxygen evolution catalysts, V<sub>onset</sub> (V<sub>RHE</sub>) denotes the onset potential.

| Structure                                                             | Method                      | J <sub>ph</sub> <sup>(1)</sup> | J <sub>ph</sub> <sup>(2)</sup> | Stability                      | V <sub>onset</sub> | ABPE (%) | Electrolyte                           | Ref.      |
|-----------------------------------------------------------------------|-----------------------------|--------------------------------|--------------------------------|--------------------------------|--------------------|----------|---------------------------------------|-----------|
| BiVO <sub>4</sub> /VO <sub>2</sub> /CoFeO <sub>x</sub>                | Sol-gel/SPO/PED             | 1.3                            | 6.2 ↑↑                         | 100 h<br>(1.23 V)              | 0.25               | 2.40 ↑↑  | PB                                    | This work |
| Mo:BiVO <sub>4</sub> /Co-Ci                                           | Sol-gel/PED                 | 1.2                            | 4.7                            | 1 h<br>(1.0 V)                 | 0.30               | -        | Bicarbonate                           | [1]       |
| N <sub>2</sub> :BiVO <sub>4</sub> /FeOOH/NiOOH                        | ED/ED                       | 1.4                            | 4.8                            | 500 h<br>(0.6 V)               | 0.22               | 2.20 ↑   | KPi                                   | [2]       |
| Mo:BiVO <sub>4</sub> /Co-Pi                                           | Dip coating/PED             | 1.9                            | 4.6                            | -                              | 0.48               | 1.09     | KPi                                   | [3]       |
| [001] BiVO <sub>4</sub> /Co-Pi                                        | Laser ablation/ED           | 3.9 ↑↑                         | 6.1 ↑                          | 6 h<br>(0.6 V)                 | 0.15               | -        | KPi                                   | [4]       |
| Mo:BiVO <sub>4</sub> /NiOOH/FeOOH                                     | MOD/PED                     | 2.0                            | 5.0                            | 8 h<br>(1.15 V)                | 0.20               | 2.08     | Potassium chloride                    | [5]       |
| BiVO <sub>4</sub> /Co(CO <sub>3</sub> ) <sub>x</sub> OH <sub>y</sub>  | ED/Hydrothermal method      | 1.9                            | 5.1                            | 20 h<br>(0.6 V)                | 0.20               | 1.87     | PB                                    | [6]       |
| BiVO <sub>4</sub> /NiFeO <sub>x</sub>                                 | ED/PED                      | 2.9                            | 5.0                            | 10 h<br>(0.6 V)                | 0.23               | 2.25     | PB                                    | [7]       |
| BiVO <sub>4</sub> /NiFeOOH/Co-Ci                                      | Dip coating/PED             | 1.0                            | 4.1                            | 3 h<br>(1.23 V)                | 0.30               | 0.95     | Na <sub>2</sub> SO <sub>4</sub>       | [8]       |
| Mo:BiVO <sub>4</sub> /RhO <sub>2</sub>                                | Drop casting/MOD            | 2.1                            | 2.7                            | 12 h<br>(1.23 V)               | 0.25               | -        | Sea water                             | [9]       |
| BiVO <sub>4</sub> /Al <sub>2</sub> O <sub>3</sub>                     | Drop casting/ALD            | 0.5                            | 1.0                            | -                              | 0.30               | -        | Phosphate buffer                      | [10]      |
| BiVO <sub>4</sub> /Al <sub>2</sub> O <sub>3</sub>                     | Hydrothermal method/ED      | 0.4                            | 0.5                            | 7.5 h<br>(1.23V)               | 0.38               | -        | Sodium phosphate                      | [11]      |
| BiVO <sub>4</sub> /PdO                                                | ED/ED                       | 1.8                            | 4.9 ↑                          | 80 h<br>(0.6 V)                | 0.20               | 1.72     | PB                                    | [12]      |
| BiVO <sub>4</sub> /NiO <sub>x</sub>                                   | Sol-gel/ED                  | 0.3                            | 1.6                            | 1 h<br>(1.23 V)                | 0.31               | -        | Sodium borate                         | [13]      |
| BiVO <sub>4</sub> /TiO <sub>2</sub>                                   | ED/ALD                      | 0.6                            | 1.1                            | 40 <sup>th</sup> cycles<br>LSV | 0.41               | -        | KPi                                   | [14]      |
| BiVO <sub>4</sub> /R:TiO <sub>2</sub>                                 | ED/ALD                      | 0.8                            | 2.1                            | 6 h<br>(0.9 V)                 | 0.20               | -        | PB                                    | [15]      |
| BiVO <sub>4</sub> /BiFeO <sub>3</sub>                                 | Hydrothermal method/Sol-gel | 0.2                            | 0.6                            | 2 h<br>(0.6 V)                 | 0.40               | -        | KPi                                   | [16]      |
| BiVO <sub>4</sub> /A:TiO <sub>2</sub>                                 | ED/ALD                      | 1.3                            | 3.0                            | 3h<br>(1.23 V)                 | 0.53               | -        | Na <sub>2</sub> SO <sub>4</sub>       | [17]      |
| C:BiVO <sub>4</sub> /CQDs                                             | ED/Hydrothermal method      | 1.4                            | 4.8                            | 9h<br>(0.6 V)                  | 0.25               | 1.61     | Borate buffer                         | [18]      |
| Mo:BiVO <sub>4</sub> /Nb:TiO <sub>2</sub> /FeNiO <sub>x</sub>         | MOD/ALD/ED                  | 1.5                            | 5.6                            | 16 h<br>(1.23 V)               | 0.51               | -        | H <sub>3</sub> PO <sub>4</sub> + NaOH | [19]      |
| BiVO <sub>4</sub> /ZnFe <sub>2</sub> O <sub>4</sub> /Co <sup>2+</sup> | ED/PED/Dip coating          | 1.0                            | 3.0                            | 1 h<br>(1.23 V)                | 0.40               | -        | Potassium hydroxide                   | [20]      |

## References

- 1 J. H. Kim, Y. Jo, J. H. Kim, J. W. Jang, H. J. Kang, Y. H. Lee, D. S. Kim, Y. Jun and J. S. Lee, *ACS Nano*, 2015, **9**, 11820–11829.
- 2 T. W. Kim, Y. Ping, G. A. Galli and K. S. Choi, *Nat. Commun.*, 2015, **6**, 1–10.
- 3 M. Rohloff, B. Anke, S. Zhang, U. Gernert, C. Scheu, M. Lerch and A. Fischer, *Sustain. Energy Fuels*, 2017, **1**, 1830–1846.
- 4 H. S. Han, S. Shin, D. H. Kim, I. J. Park, J. S. Kim, P. S. Huang, J. K. Lee, I. S. Cho and X. Zheng, *Energy Environ. Sci.*, 2018, **11**, 1299–1306.
- 5 J. H. Kim, J. W. Jang, Y. H. Jo, F. F. Abdi, Y. H. Lee, R. Van De Krol and J. S. Lee, *Nat. Commun.*, 2016, **7**, 1–9.
- 6 R. T. Gao, L. Wu, S. Liu, K. Hu, X. Liu, J. Zhang and L. Wang, *J. Mater. Chem. A*, 2021, **9**, 6298–6305.
- 7 Y. Kuang, Q. Jia, H. Nishiyama, T. Yamada, A. Kudo and K. Domen, *Adv. Energy Mater.*, 2016, **6**, 2–8.
- 8 X. Hu, Y. Li, X. Wei, L. Wang, H. She, J. Huang and Q. Wang, *Adv. Powder Mater.*, 2022, **1**, 100024.
- 9 W. Luo, Z. Yang, Z. Li, J. Zhang, J. Liu, Z. Zhao, Z. Wang, S. Yan, T. Yu and Z. Zou, *Energy Environ. Sci.*, 2011, **4**, 4046–4051.
- 10 D. G. Wang, Y. Y. Zhang, A. Aldalbahi, L. H. Wang, Q. Li and K. Wang, *Nucl. Sci. Tech.*, 2016, **27**, 1–6.
- 11 K. R. Tolod, T. Saboo, S. Hernández, H. Guzmán, M. Castellino, R. Irani, P. Bogdanoff, F. F. Abdi, E. A. Quadrelli and N. Russo, *Appl. Catal. A Gen.*, 2020, **605**, 117796.
- 12 R. T. Gao, X. Liu, X. Zhang and L. Wang, *Nano Energy*, 2021, **89**, 106360.
- 13 Y. Liang and J. Messinger, *Phys. Chem. Chem. Phys.*, 2014, **16**, 12014–12020.
- 14 E. Usman, M. Barzgar Vishlaghi, A. Kahraman, N. Solati and S. Kaya, *ACS Appl. Mater. Interfaces*, 2021, **13**, 60602–60611.
- 15 H. Chen, J. Li, W. Yang, S. E. Balaghi, C. A. Triana, C. K. Mavrokefalos and G. R. Patzke, *ACS Catal.*, 2021, **11**, 7637–7646.
- 16 J. Xie, C. Guo, P. Yang, X. Wang, D. Liu and C. M. Li, *Nano Energy*, 2017, **31**, 28–36.
- 17 Y. Zhang, X. Zhang, D. Wang, F. Wan and Y. Liu, *Appl. Surf. Sci.*, 2017, **403**, 389–395.
- 18 Y. Wang, D. Chen, J. Zhang, M. S. Balogun, P. Wang, Y. Tong and Y. Huang, *Adv. Funct. Mater.*, 2022, **32**, 2112738
- 19 M. Beetz, S. Häringer, P. Elsässer, J. Kampmann, L. Sauerland, F. Wolf, M. Günther, A. Fischer and T. Bein, *Adv. Funct. Mater.*, 2021, **31**, 1–8.
- 20 T. W. Kim and K. S. Choi, *J. Phys. Chem. Lett.*, 2016, **7**, 447–451.
